# Supplementary material for: Visible-light driven fumarate synthesis from pyruvate and gaseous CO2 with a hybrid system of photocatalytic NADH regeneration and dual biocatalysts
Source: Royal Society of Chemistry journal article supplement (doi:10.1039/d3su00194f), 2023-01-01
Supplement: d3su00194f1.pdf [file d3su00194f1.pdf]

**Supporting information**

**Visible-light driven fumarate synthesis from pyruvate and gaseous CO<sub>2</sub> with the hybrid system of photocatalytic NADH regeneration and dual biocatalysts**

Mika Takeuchi<sup>a</sup> and Yutaka Amao<sup>a,b\*</sup>

<sup>a</sup> Graduate School of Science, Osaka Metropolitan University, 3-3-138 Sugimoto,  
Sumiyoshi-ku, Osaka 558-8585, Japan

<sup>b</sup> Research Centre of Artificial Photosynthesis (ReCAP), Osaka Metropolitan University,  
3-3-138 Sugimoto, Sumiyoshi-ku, Osaka 558-8585, Japan,  
Email: amao@omu.ac.jp

## 1. Determination for pyruvate and L-malate concentration using ion chromatography

The concentrations of pyruvate and L-malate were determined using ion chromatography system (Metrohm, Eco IC; electrical conductivity detector) with an ion exclusion column (Metrosep Organic Acids 250/7.8 Metrohm; column size: 7.8 x 250 mm; composed of 9  $\mu\text{m}$  polystyrene-divinylbenzene copolymer with sulfonic acid groups). The 1.0 mM perchloric acid and 50 mM lithium chloride in aqueous solution were used as an eluent and a regenerant, respectively. Flow rate of eluent solution was adjusted to be 0.5 mL  $\text{min}^{-1}$ . The retention time for pyruvate was detected at 8.71-9.20 min. The electrical conductivity changes in the various pyruvate concentrations (0 - 10 mM) were shown in Figure S1(a). The inset of Figure S1(a) shows the relationship between the pyruvate concentration and the detection peak area using ion chromatograph.

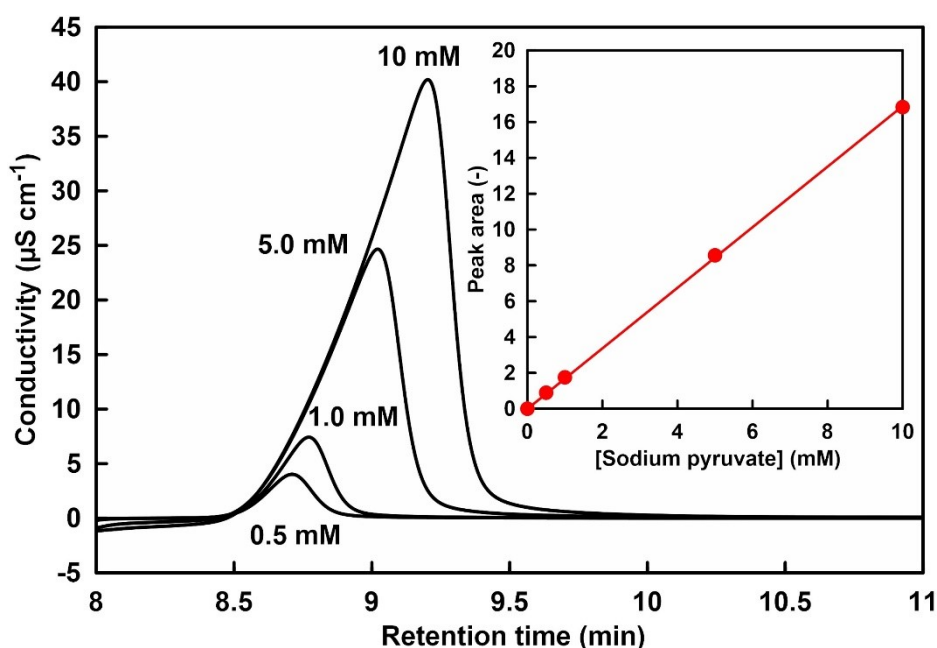

**Figure S1.** Chromatogram of sodium pyruvate (0 - 10 mM) in 50 mM-HEPES buffer (pH 7.0). Inset: Relationship between the sodium pyruvate concentration and the detection peak area.

As shown in the inset of Figure S1, the sodium pyruvate concentration and the detected peak area showed a good linear relationship (correlation coefficient:  $r^2=0.999$ ) as following equation (S1).

$$\text{Peak area} = 1.69 \times [\text{Pyruvate}] (\text{mM}) \quad (\text{S1})$$

The retention time for L-malate was detected at 10.11-10.13 min. The electrical conductivity changes in the various L-malate concentrations (0 – 1.0 mM) during the ion chromatograph analysis were shown in Figure S2. Inset of Figure S2 shows the relationship between the L-malate concentration and the detection peak area using ion

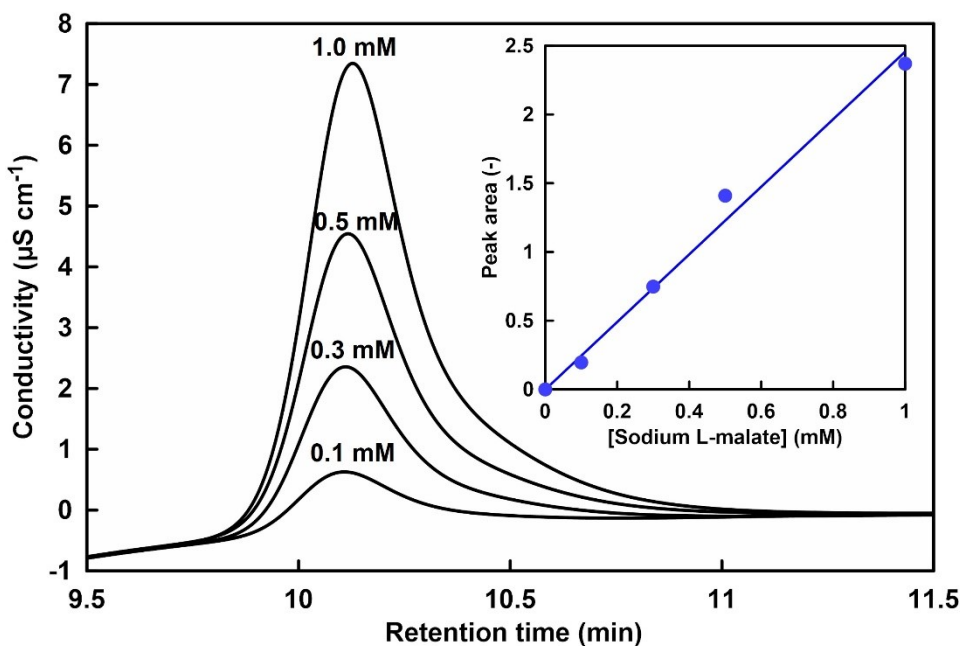

chromatograph.

**Figure S2.** Chromatogram of sodium L-malate (0 - 1000  $\mu\text{M}$ ) in 50 mM-HEPES buffer (pH 7.0). Inset: Relationship between the L-malate concentration and the detection peak area.

As shown in the inset of Figure S2, the L-malate concentration and the detected peak area showed a good linear relationship (correlation coefficient:  $r^2=0.999$ ) as following equation (S2).

$$\text{Peak area} = 2.46 \times [\text{L-malate}] (\text{mM}) \quad (\text{S2})$$

The retention time for fumarate was detected at 12.28-12.37 min. The electrical conductivity changes in the various sodium fumarate concentrations (0 – 1.0 mM) during the ion chromatograph analysis were shown in Figure S3. Inset of Figure S3 shows the relationship between the sodium fumarate concentration and the detection peak area using ion chromatograph.

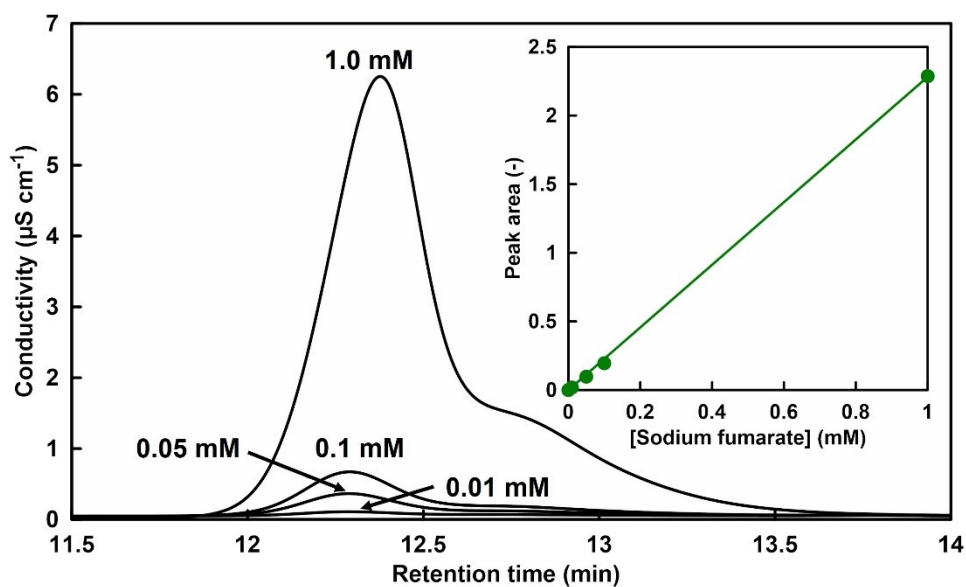

**Figure S3.** Chromatogram of sodium fumarate (0 – 1.0 mM) in 50 mM-HEPES buffer (pH 7.0). Inset: Relationship between the fumarate concentration and the detection peak area.

As shown in the inset of Figure S3, the fumarate concentration and the detected peak area showed a good linear relationship (correlation coefficient:  $r^2=0.999$ ) as following equation (S3).

$$\text{Peak area} = 2.28 \times [\text{fumarate}] (\mu\text{M}) \quad (\text{S3})$$

## 2. L-Malate synthesis from the pyruvate and direct captured CO<sub>2</sub> with MDH

Figure S4 shows a chart of an ion chromatogram sampled from the reaction solution of sodium pyruvate (5.0 mM), magnesium chloride (5.0 mM), NADH (5.0 mM) and MDH (0.7 U, *ca.* 1.6  $\mu$ M) in 5.0 mL of 500 mM HEPES-NaOH buffer (pH 7.8) during the incubation.

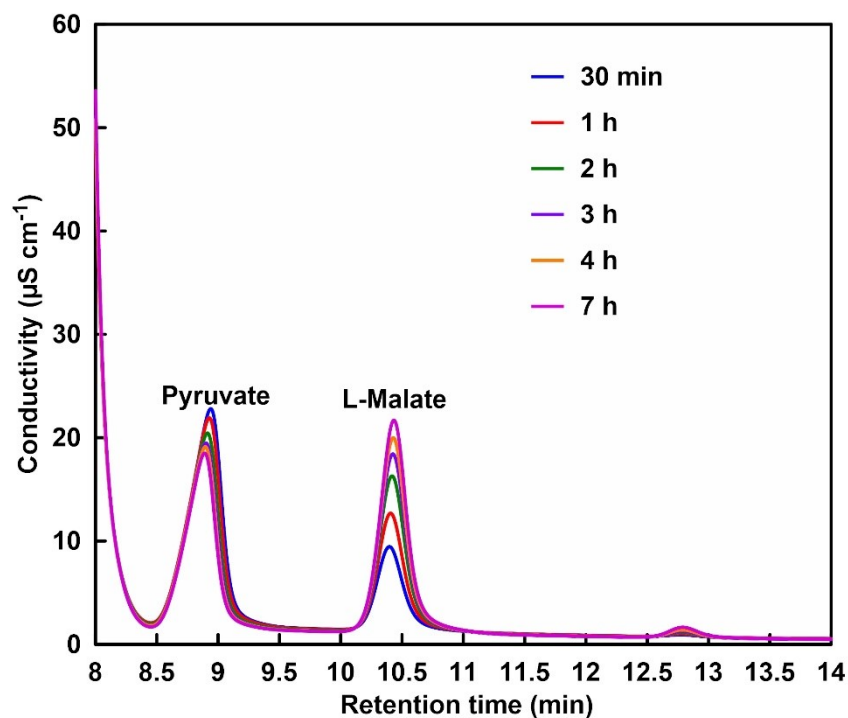

**Figure S4.** A chart of an ion chromatogram for pyruvate or L-malate concentration in the solution of sodium pyruvate (5.0 mM), magnesium chloride (5.0 mM), NADH (5.0 mM) and MDH (0.7 U, *ca.* 1.6  $\mu$ M) in 5.0 mL of 500 mM HEPES-NaOH buffer (pH 7.8). The gas phase: CO<sub>2</sub>.

### 3. Fumarate synthesis from the pyruvate and direct captured CO<sub>2</sub> with MDH and FUM

Figure S5 shows a chart of an ion chromatogram sampled from the reaction solution of sodium pyruvate (5.0 mM), magnesium chloride (5.0 mM), NADH (5.0 mM), MDH (0.7 U, *ca.* 1.6  $\mu$ M) and FUM (0.5 U; 1.3 nM) in 5.0 mL of 500 mM HEPES-NaOH buffer (pH 7.8) during the incubation.

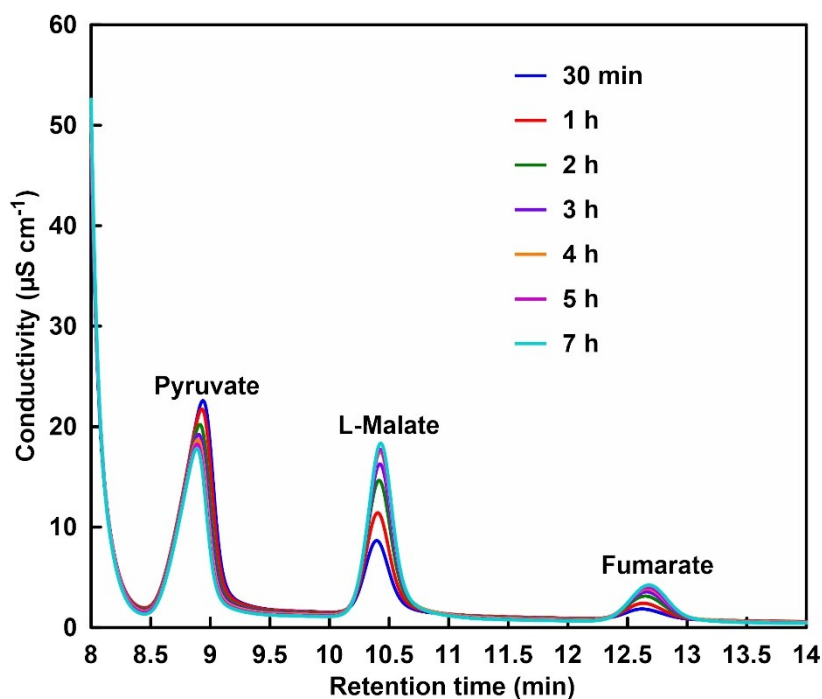

**Figure S5.** A chart of an ion chromatogram for pyruvate, L-malate or fumarate concentration in the solution of sodium pyruvate (5.0 mM), magnesium chloride (5.0 mM), NADH (5.0 mM), MDH (0.7 U, *ca.* 1.6  $\mu$ M) and FUM (0.5 U; 1.3 nM) in 5.0 mL of 500 mM HEPES-NaOH buffer (pH 7.8). The gas phase: CO<sub>2</sub>.

#### 4. Visible-light driven L-malate synthesis from pyruvate and direct captured CO<sub>2</sub> with the system of TEOA, ZnTPPS, [Cp\*Rh(bpy)(H<sub>2</sub>O)]<sup>2+</sup>, NAD<sup>+</sup> and MDH

Figure S6 shows a chart of an ion chromatogram sampled from the reaction solution of sodium pyruvate (5.0 mM), magnesium chloride (5.0 mM), TEOA (0.2 M), ZnTPPS (10 μM), [Cp\*Rh(bpy)(H<sub>2</sub>O)]<sup>2+</sup> (10 μM), NAD<sup>+</sup> (0.5 mM) and MDH (0.7 U, *ca.* 1.6 μM) in 5 mL of 500 mM HEPES-NaOH buffer (pH 7.8) with irradiation. The gas phase was filled with CO<sub>2</sub> gas.

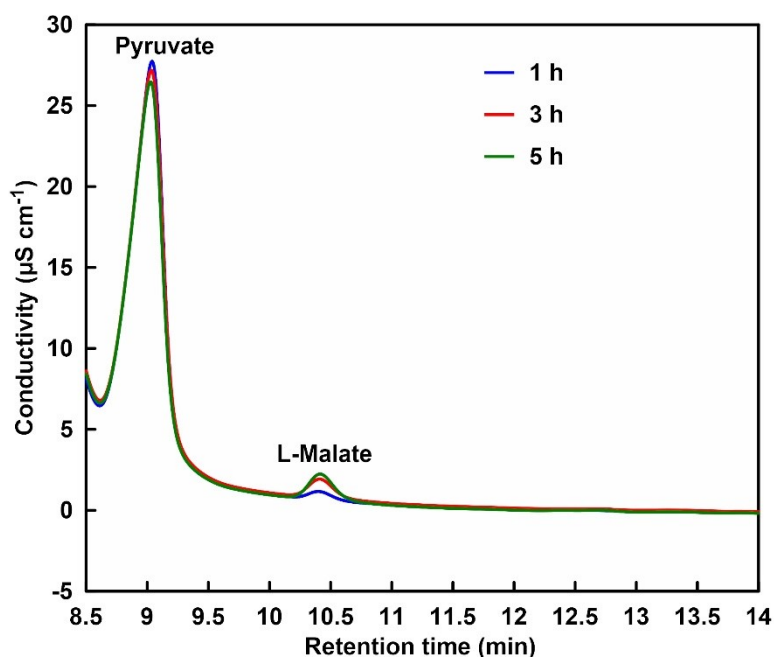

**Figure S6.** A chart of an ion chromatogram for pyruvate or L-malate concentration in the solution of sodium pyruvate (5.0 mM), magnesium chloride (5.0 mM), TEOA (0.2 M), ZnTPPS (10 μM), [Cp\*Rh(bpy)(H<sub>2</sub>O)]<sup>2+</sup> (10 μM), NAD<sup>+</sup> (0.5 mM) and MDH (0.7 U, *ca.* 1.6 μM) in 5 mL of 500 mM HEPES-NaOH buffer (pH 7.8) with irradiation. The gas phase was filled with CO<sub>2</sub> gas.

## 5. Visible-light driven fumarate synthesis from pyruvate and direct captured CO<sub>2</sub> with the system of TEOA, ZnTPPS, [Cp\*Rh(bpy)(H<sub>2</sub>O)]<sup>2+</sup>, NAD<sup>+</sup>, MDH and FUM

Figure S7 shows a chart of an ion chromatogram sampled from the reaction solution of sodium pyruvate (5.0 mM), magnesium chloride (5.0 mM), TEOA (0.2 M), ZnTPPS (10 μM), [Cp\*Rh(bpy)(H<sub>2</sub>O)]<sup>2+</sup> (10 μM), NAD<sup>+</sup> (0.5 mM), MDH (0.7 U, *ca.* 1.6 μM) and FUM (0.5 U; 1.3 nM) in 5 mL of 500 mM HEPES-NaOH buffer (pH 7.8) under conditions with varying ratios of CO<sub>2</sub> and N<sub>2</sub> in the gas phase with irradiation.

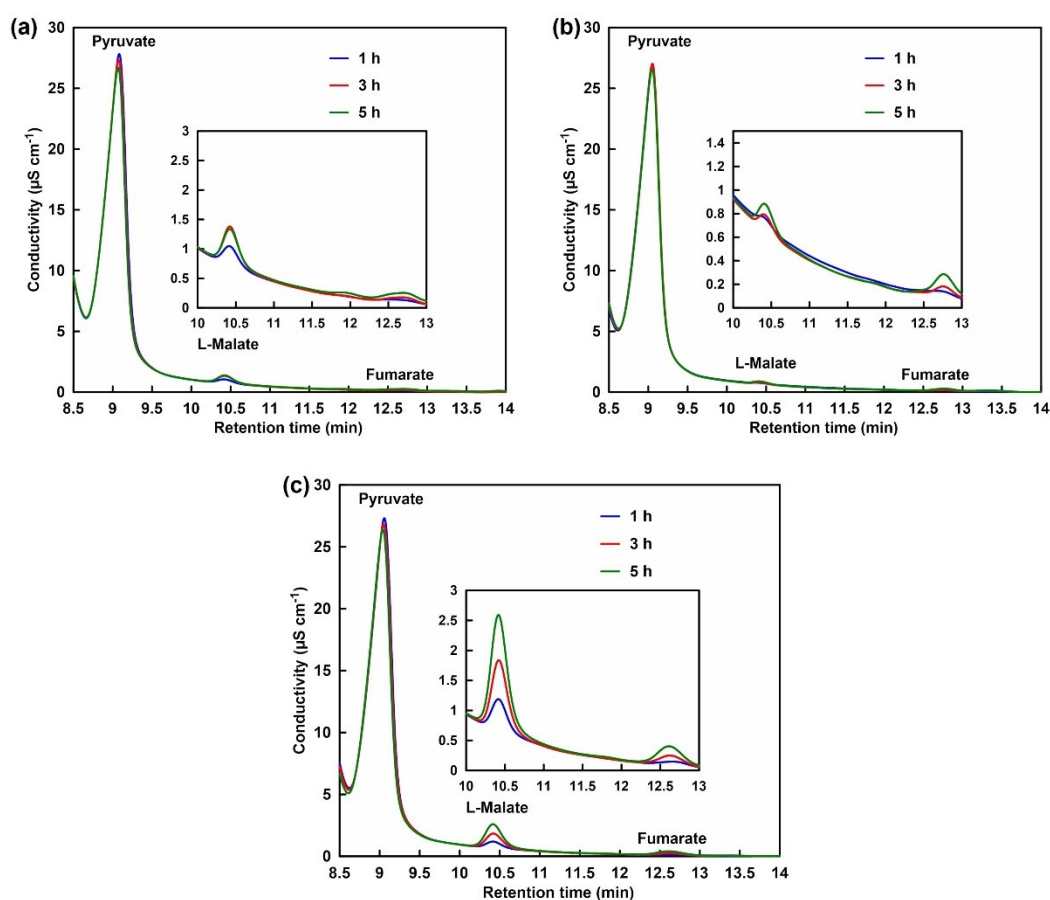

**Figure S7.** A chart of an ion chromatogram for pyruvate, L-malate or fumarate concentration in the solution of sodium pyruvate (5.0 mM), magnesium chloride (5.0 mM), TEOA (0.2 M), ZnTPPS (10 μM), [Cp\*Rh(bpy)(H<sub>2</sub>O)]<sup>2+</sup> (10 μM), NAD<sup>+</sup> (0.5 mM), MDH (0.7 U, *ca.* 1.6 μM) and FUM (0.5 U; 1.3 nM) in 5 mL of 500 mM HEPES-NaOH buffer (pH 7.8) under conditions with irradiation. The gas phase : (a) 15 % CO<sub>2</sub> gas, (b) 50 % CO<sub>2</sub> gas and (c) 100 % CO<sub>2</sub> gas.
